# Supplementary material for: Dietary Supplementation with Goji Berries (Lycium barbarum) Modulates the Microbiota of Digestive Tract and Caecal Metabolites in Rabbits
Source: MDPI journal article supplement (doi:10.3390/ani12010121), 2022-01-05
Supplement: s1 [file s1]

## Supplementary materials

**Table S1.** Significantly different OTUs between Goji-treated and control rabbits in the gut microbiota ( $p < 0.05$ ). OTUs are grouped and ordered by taxonomic level.

| Level  | New_taxa                             | Term      | <i>p</i> -value |
|--------|--------------------------------------|-----------|-----------------|
| Phylum | Cyanobacteria                        | Treatment | 0.034474138     |
| Phylum | Euryarchaeota                        | Treatment | 0.004589084     |
| Class  | Bacilli                              | Treatment | 0.015972341     |
| Class  | Methanobacteria                      | Treatment | 0.004589084     |
| Order  | Bacillales                           | Treatment | 0.003293078     |
| Order  | Methanobacteriales                   | Treatment | 0.004589084     |
| Order  | Micrococcales                        | Treatment | 0.021952641     |
| Order  | Propionibacteriales                  | Treatment | 0.000000004     |
| Order  | Rickettsiales                        | Treatment | 0.000000017     |
| Family | Bacillaceae                          | Treatment | 0.007467206     |
| Family | Christensenellaceae                  | Treatment | 0.045257535     |
| Family | Clostridiaceae 1                     | Treatment | 0.025859043     |
| Family | Defluviitaleaceae                    | Treatment | 0.022785570     |
| Family | Dermatophilaceae                     | Treatment | 0.027665389     |
| Family | Family XVIII                         | Treatment | 0.019420602     |
| Family | Lactobacillaceae                     | Treatment | 0.001800593     |
| Family | Methanobacteriaceae                  | Treatment | 0.004589084     |
| Family | Mitochondria                         | Treatment | 0.000000017     |
| Family | Paenibacillaceae                     | Treatment | 0.007016148     |
| Family | Peptococcaceae                       | Treatment | 0.000160420     |
| Family | Planococcaceae                       | Treatment | 0.016096493     |
| Family | Propionibacteriaceae                 | Treatment | 0.000000004     |
| Family | Thermoactinomycetaceae               | Treatment | 0.001003246     |
| Genus  | [Acetivibrio]<br>ethanolignens group | Treatment | 0.019951185     |
| Genus  | [Eubacterium] fissicatena<br>group   | Treatment | 0.021816711     |
| Genus  | [Eubacterium]<br>oxidoreducens group | Treatment | 0.022836309     |
| Genus  | [Ruminococcus] gauvreauui<br>group   | Treatment | 0.009420603     |
| Genus  | [Ruminococcus] torques<br>group      | Treatment | 0.004995398     |
| Genus  | A2                                   | Treatment | 0.003213852     |
| Genus  | Aeribacillus                         | Treatment | 0.000391870     |
| Genus  | Bacillus                             | Treatment | 0.003641939     |
| Genus  | Brevibacillus                        | Treatment | 0.006003995     |
| Genus  | Christensenellaceae R-7<br>group     | Treatment | 0.031217248     |
| Genus  | Clostridium sensu stricto 3          | Treatment | 0.014915748     |
| Genus  | Cutibacterium                        | Treatment | 0.000000004     |
| Genus  | Defluviitaleaceae UCG-011            | Treatment | 0.022785570     |
| Genus  | Delftia                              | Treatment | 0.000037421     |
| Genus  | dgA-11 gut group                     | Treatment | 0.017195412     |
| Genus  | Eisenbergiella                       | Treatment | 0.015038910     |
| Genus  | Howardella                           | Treatment | 0.006429800     |
| Genus  | Hydrogenoanaerobacteriu<br>m         | Treatment | 0.005349264     |
| Genus  | Intestinimonas                       | Treatment | 0.007919486     |

|       |                               |           |             |
|-------|-------------------------------|-----------|-------------|
| Genus | Lachnospiraceae AC2044 group  | Treatment | 0.001258252 |
| Genus | Lachnospiraceae NK3A20 group  | Treatment | 0.002553156 |
| Genus | Lachnospiraceae NK4B4 group   | Treatment | 0.006247137 |
| Genus | Lachnospiraceae XPB1014 group | Treatment | 0.003982549 |
| Genus | Lactobacillus                 | Treatment | 0.001800593 |
| Genus | Lysinibacillus                | Treatment | 0.014481758 |
| Genus | Methanobrevibacter            | Treatment | 0.002911108 |
| Genus | Moryella                      | Treatment | 0.002802719 |
| Genus | Novibacillus                  | Treatment | 0.004077850 |
| Genus | Odoribacter                   | Treatment | 0.028204867 |
| Genus | Oribacterium                  | Treatment | 0.001299886 |
| Genus | Other                         | Treatment | 0.033730769 |
| Genus | Paenibacillus                 | Treatment | 0.037093665 |
| Genus | Planifilum                    | Treatment | 0.001268503 |
| Genus | Roseburia                     | Treatment | 0.049833659 |
| Genus | Ruminiclostridium 1           | Treatment | 0.013353148 |
| Genus | Ruminococcaceae UCG-005       | Treatment | 0.014962080 |
| Genus | Ruminococcaceae UCG-007       | Treatment | 0.016071297 |
| Genus | Ruminococcaceae UCG-010       | Treatment | 0.025302373 |
| Genus | Sarcina                       | Treatment | 0.033709326 |
| Genus | Solanum melongena (eggplant)  | Treatment | 0.000000017 |
| Genus | Staphylococcus                | Treatment | 0.030172544 |
| Genus | Symbiobacterium               | Treatment | 0.019420602 |
| Genus | Terribacillus                 | Treatment | 0.047458506 |
| Genus | Thermoactinomyces             | Treatment | 0.001940909 |
| Genus | Thermobacillus                | Treatment | 0.004471494 |

---

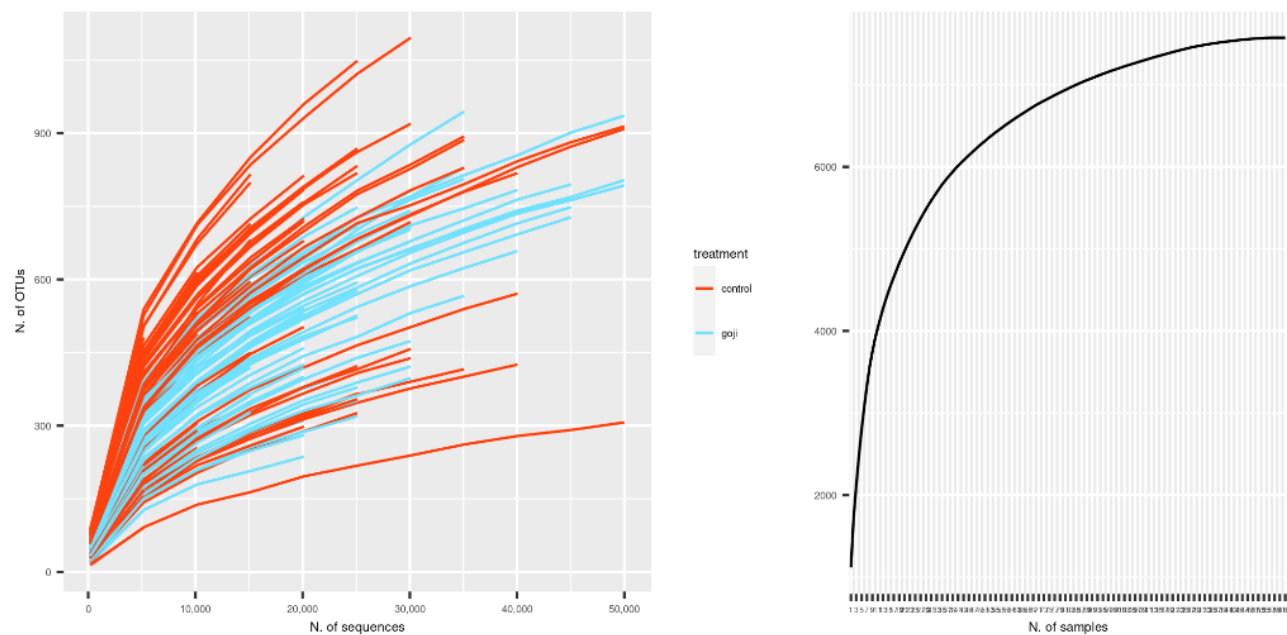

**Figure S1.** Evaluation of the sample-based and sequence-based bacterial rarefaction curves to check the depth of coverage.

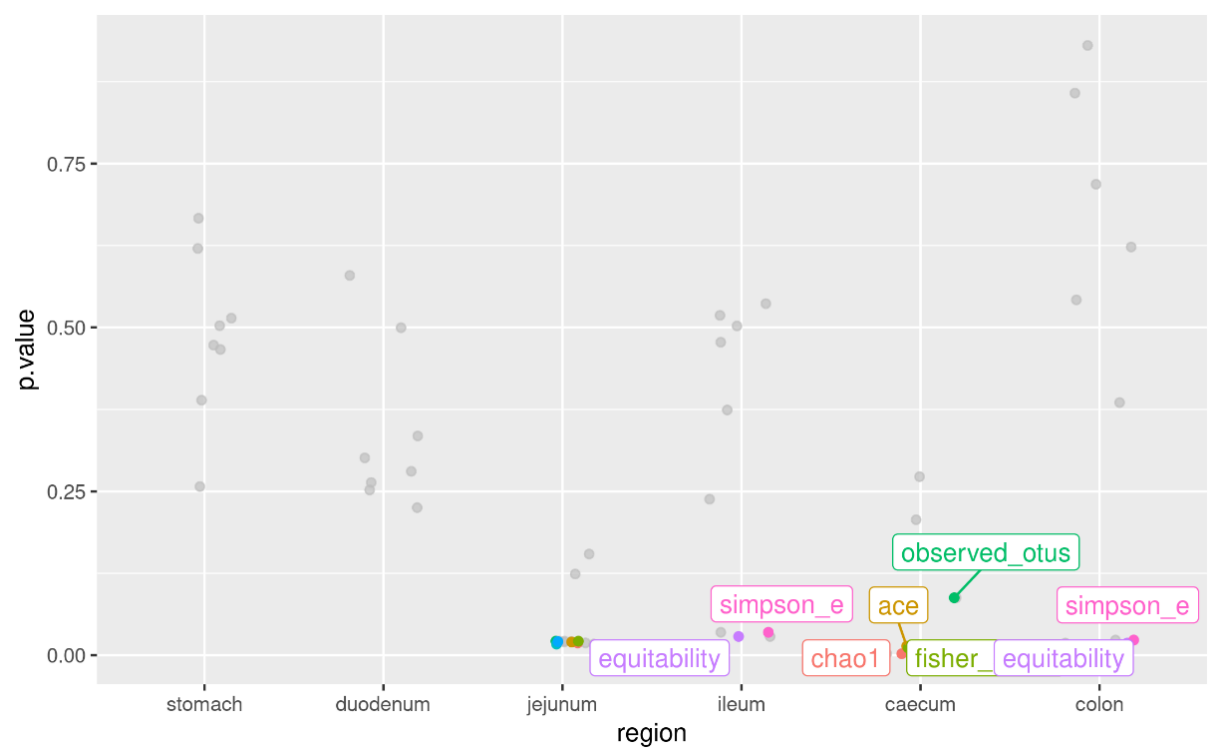

**Figure S2.** P-values for the difference in alpha diversity indices between control and Goji-treated rabbits, along the gastrointestinal tract. Significance was defined as  $p < 0.05$ . Significant differences are highlighted (colored) and labeled.
